# Supplementary material for: Donor type/graft source selection strategies based on disease status for paediatric acute myeloid leukemia transplantation
Source: Research Square preprint supplement (doi:10.21203/rs.3.rs-7783403/v1), 2025-10-17
Supplement: Supplementary file 1 [file 57902c46ad96b2601a4f7784.docx]

**Supplementary Table S1. Causes of death**

|  | AML remission group (n = 62) | | | AML nonremission group (n = 103) | | |
| --- | --- | --- | --- | --- | --- | --- |
|  | HRD | MUD | UCB | HRD | MUD | UCB |
| ARDS | 0 | 1 | 0 | 0 | 0 | 0 |
| TMA | 0 | 0 | 0 | 1 | 1 | 2 |
| SOS | 0 | 0 | 2 | 1 | 0 | 1 |
| MOF | 1 | 3 | 3 | 0 | 6 | 4 |
| Pulmonary disease (noninfection) | 1 | 0 | 0 | 0 | 1 | 4 |
| Infection | 1 | 3 | 1 | 2 | 1 | 1 |
| GVHD | 3 | 3 | 1 | 2 | 3 | 0 |
| Rejection | 0 | 0 | 3 | 1 | 0 | 0 |
| Relapse | 2 | 7 | 25 | 17 | 9 | 41 |
| Bleeding | 0 | 1 | 1 | 2 | 0 | 3 |
| Others | 0 | 0 | 0 | 1 | 1 | 0 |
|  | 8 | 18 | 36 | 26 | 21 | 56 |

HRD, haploidentical related donor; MUD, matched unrelated donor; UCB, umbilical cord blood;

ARDS, acute respiratory distress syndrome; TMA, thrombotic microangiopathy; SOS, sinusoidal obstruction syndrome; MOF, multiple organ failure; GVHD, graft-versus-host disease.
